# Supplementary material
Source: MDPI journal article supplement (https://www.mdpi.com/2073-4433/14/12/1806)
Supplement: s1 [file s1 › atmosphere-2744114-supplementary.pdf]

# Supplement for “Ambient ozone and fine particulate matter pollution in a megacity in South China: Trends, concurrent pollution, and health risk assessment”

Pei Zeng <sup>1,\*</sup>, Xiaobo Huang <sup>1</sup>, Min Yan <sup>1</sup>, Zhuoyun Zheng <sup>1,\*</sup>, Zhicheng Qiu <sup>2</sup>, Long Yun <sup>2</sup>, Chuxiong Lin <sup>2</sup>, and Li Zhang <sup>3</sup>

<sup>1</sup> Department of Atmospheric Environment and Climate Change Research, Shenzhen Academy of Environmental Sciences, Shenzhen 518000, China;

<sup>2</sup> Department of Atmospheric Environment Monitoring, Shenzhen Ecological and Environmental Monitoring Center of Guangdong Province, Shenzhen 518000, China;

<sup>3</sup> Climate Research Department, Shenzhen National Climate Observatory, Shenzhen 518000, China;

\* Correspondence: zengpei@meeb.sz.gov.cn, zhengzhuoyun@meeb.sz.gov.cn

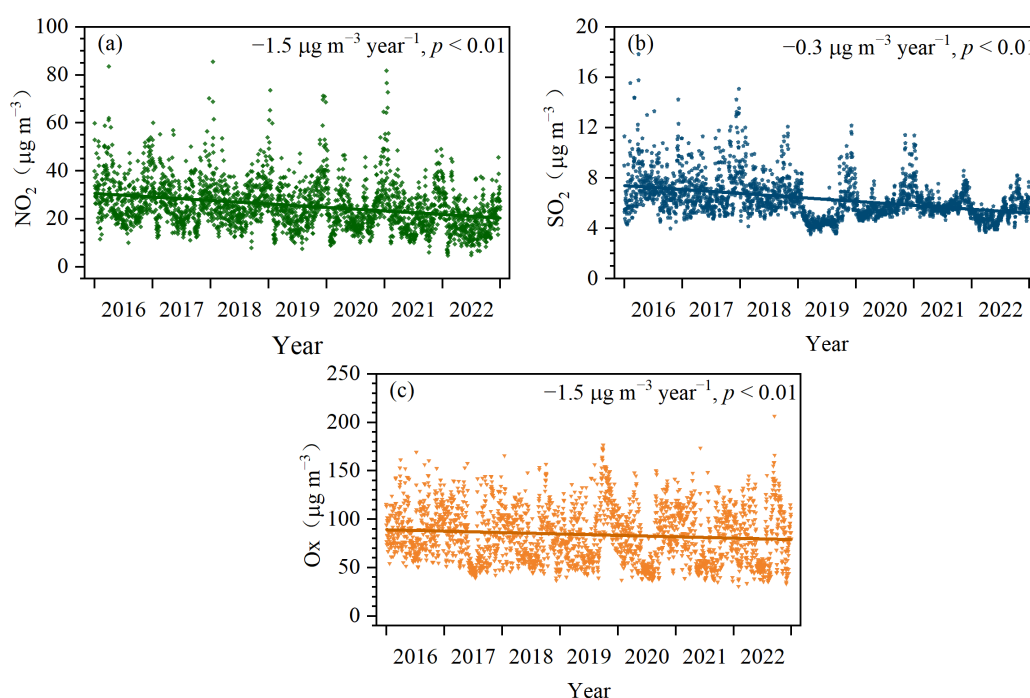

**Figure S1.** Trends of daily average NO<sub>2</sub>, SO<sub>2</sub>, and Ox concentrations in Shenzhen from 2016 to 2022.

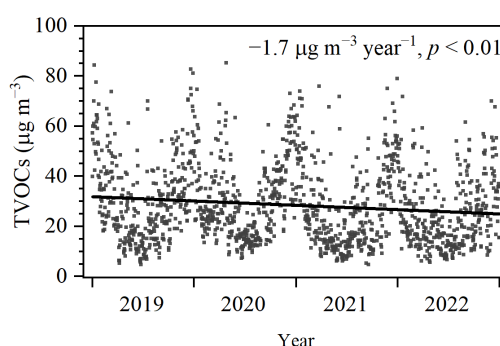

**Figure S2.** Trends of daily average TVOCs concentrations at the LH site during 2019 and 2022.

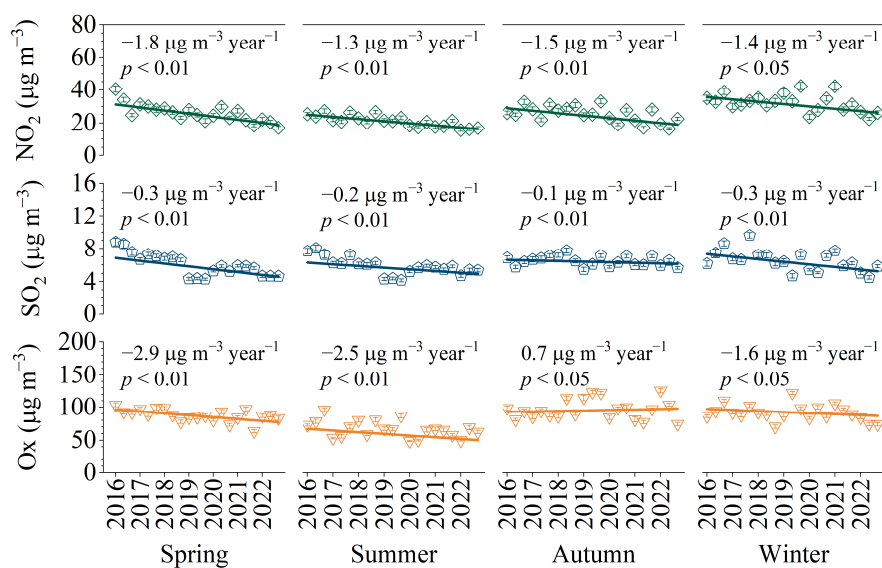

**Figure S3.** Trends of monthly average NO<sub>2</sub>, SO<sub>2</sub>, and O<sub>3</sub> concentrations in different seasons in Shenzhen from 2016 to 2022. The error bar represents the 95% CI of the monthly averages.

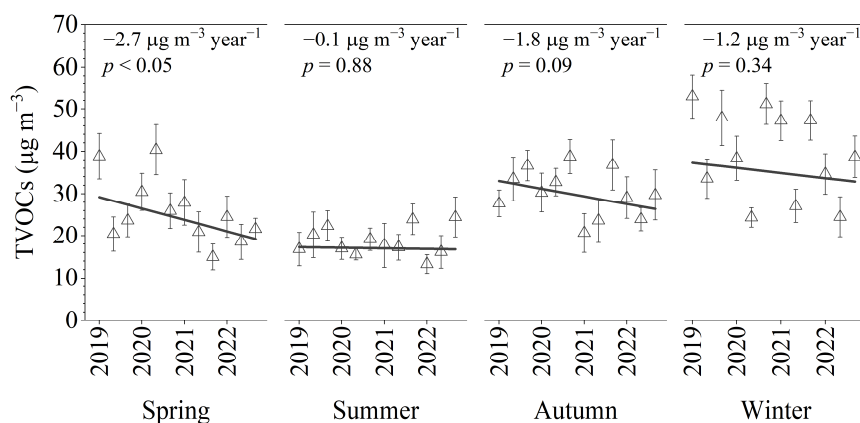

**Figure S4.** Trends of monthly average TVOCs concentrations in different seasons at the LH site from 2019 to 2022. The error bar represents the 95% CI of the monthly averages.

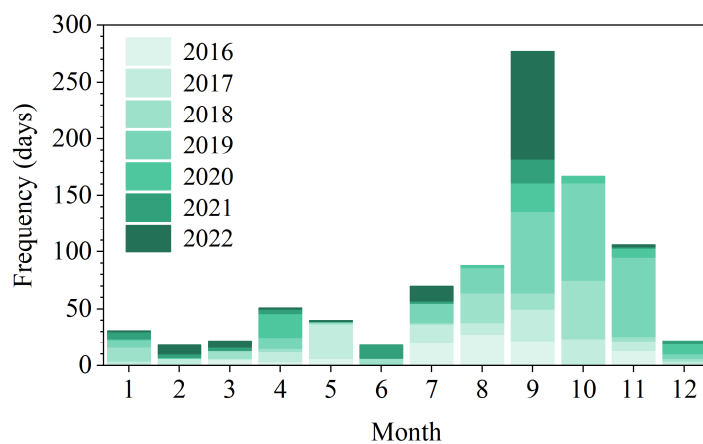

**Figure S5.** Frequency of high-O<sub>3</sub>-and-PM<sub>2.5</sub> days at 13 BAQM sites from 2016 to 2022.

**Table S1.** Detailed information of the of 14 air quality monitoring sites in Shenzhen.

| Site name          | Administrative district | Geographical coordinate | Site type                                | Site details                                                          |
|--------------------|-------------------------|-------------------------|------------------------------------------|-----------------------------------------------------------------------|
| Guanlan (GL)       | Longhua                 | 114.07° E, 22.74° N     | National air quality monitoring station  | Urban site, surrounded by residential and industrial blocks           |
| Guangming (GM)     | Guangming               | 113.95° E, 22.76° N     | Municipal air quality monitoring station | Urban site, surrounded by parkland and residential blocks             |
| Honghu (HH)        | Luohu                   | 114.13° E, 22.57° N     | National air quality monitoring station  | Urban site, surrounded by parkland, residential and commercial blocks |
| Huaqiaocheng (HQC) | Nanshan                 | 113.99° E, 22.54° N     | National air quality monitoring station  | Urban site, surrounded by parkland, residential and commercial blocks |
| Kuichong (KC)      | Dapeng                  | 114.42° E, 22.64° N     | National air quality monitoring station  | Urban site, surrounded by residential blocks                          |
| Longgang (LG)      | Longgang                | 114.23° E, 22.72° N     | National air quality monitoring station  | Urban site, surrounded by parkland, residential and commercial blocks |
| Meisha (MS)        | Yantian                 | 114.31° E, 22.60° N     | National air quality monitoring station  | Urban site, surrounded by residential and commercial blocks           |
| Nanao (NA)         | Dapeng                  | 114.50° E, 22.54° N     | National air quality monitoring station  | Urban site, surrounded by residential and commercial blocks           |
| Nanhai (NH)        | Nanshan                 | 113.93° E, 22.52° N     | National air quality monitoring station  | Urban site, surrounded by residential and commercial blocks           |
| Pingshan (PS)      | Pingshan                | 114.36° E, 22.72° N     | National air quality monitoring station  | Urban site, surrounded by parkland and commercial blocks              |
| Tongxinling (TXL)  | Futian                  | 114.11° E, 22.55° N     | National air quality monitoring station  | Urban site, surrounded by parkland, residential and commercial blocks |
| Xixiang (XX)       | Baoan                   | 113.91° E, 22.58° N     | National air quality monitoring station  | Urban site, surrounded by parkland, residential and commercial blocks |
| Yantian (YT)       | Yantian                 | 114.25° E, 22.57° N     | National air quality monitoring station  | Urban site, surrounded by parkland, residential and industrial blocks |
| Lianhua (LH)       | Futian                  | 114.07° E, 22.56° N     | National air quality monitoring station  | Urban site, surrounded by parkland, residential and commercial blocks |

**Table S2.** Exposure-response coefficients for the long-term mortality effects of PM<sub>2.5</sub> and O<sub>3</sub>.

| Health endpoint            |                                                  | $\beta$ (%) | 95% CI (%)    |
|----------------------------|--------------------------------------------------|-------------|---------------|
| PM <sub>2.5</sub> -related | Non-accidental all-cause premature mortality [1] | 7.70        | (5.83, 8.62)  |
|                            | Cardiovascular mortality [2]                     | 13.10       | (7.70, 19.06) |
|                            | Respiratory mortality [1]                        | 9.53        | (2.96, 16.55) |

|                         | Health endpoint                                  | $\beta$ (%) | 95% CI (%)   |
|-------------------------|--------------------------------------------------|-------------|--------------|
| O <sub>3</sub> -related | Non-accidental all-cause premature mortality [3] | 1.39        | (0.90, 1.88) |
|                         | Cardiovascular mortality [3]                     | 1.88        | (0.40, 3.44) |
|                         | Respiratory mortality [3]                        | 2.47        | (1.00, 3.92) |

**Table S3.** Statistical descriptions of meteorological parameters in different seasons

| Levels<br>(mean $\pm$ 95% CI)   | Spring          | Summer          | Autumn          | Winter          |
|---------------------------------|-----------------|-----------------|-----------------|-----------------|
| Temperature (°C)                | 23.3 $\pm$ 0.02 | 29.0 $\pm$ 0.01 | 25.4 $\pm$ 0.02 | 16.9 $\pm$ 0.02 |
| Relative humidity (%)           | 78.9 $\pm$ 0.1  | 80.4 $\pm$ 0.1  | 71.8 $\pm$ 0.1  | 68.8 $\pm$ 0.1  |
| Days with precipitation (days)  | 34.9 $\pm$ 7.8  | 53.0 $\pm$ 3.4  | 29.1 $\pm$ 5.2  | 17.9 $\pm$ 5.3  |
| Wind speed (m s <sup>-1</sup> ) | 1.8 $\pm$ 0.01  | 1.9 $\pm$ 0.01  | 1.9 $\pm$ 0.01  | 1.9 $\pm$ 0.01  |

**Table S4.** Statistical descriptions of air pollutants under different scenarios.

| Concentrations ( $\mu\text{g m}^{-3}$ )<br>(mean $\pm$ 95% CI) | High-O <sub>3</sub> -and-PM <sub>2.5</sub> days | High-O <sub>3</sub> days |
|----------------------------------------------------------------|-------------------------------------------------|--------------------------|
| MDA8 O <sub>3</sub>                                            | 195.6 $\pm$ 2.1                                 | 184.7 $\pm$ 1.7          |
| PM <sub>2.5</sub>                                              | 47.2 $\pm$ 0.9                                  | 26.2 $\pm$ 0.4           |
| O <sub>x</sub>                                                 | 154.2 $\pm$ 1.5                                 | 137.6 $\pm$ 1.3          |
| NO <sub>2</sub>                                                | 41.0 $\pm$ 1.3                                  | 28.1 $\pm$ 0.8           |
| SO <sub>2</sub>                                                | 8.3 $\pm$ 0.2                                   | 7.0 $\pm$ 0.2            |
| TVOCs                                                          | 38.9 $\pm$ 5.1                                  | 34.4 $\pm$ 3.8           |

**Table S5.** Statistical descriptions of meteorological parameters under different scenarios.

| Levels<br>(mean $\pm$ 95% CI)          | High-O <sub>3</sub> -and-PM <sub>2.5</sub> days | High-O <sub>3</sub> days |
|----------------------------------------|-------------------------------------------------|--------------------------|
| Temperature (°C)                       | 27.1 $\pm$ 0.3                                  | 28.1 $\pm$ 0.2           |
| Wind speed (m s <sup>-1</sup> )        | 1.4 $\pm$ 0.04                                  | 1.6 $\pm$ 0.05           |
| Relative humidity (%)                  | 66.4 $\pm$ 0.7                                  | 66.8 $\pm$ 0.7           |
| Boundary layer height (m) <sup>a</sup> | 1241.9 $\pm$ 72.3                               | 1230.4 $\pm$ 81.9        |

<sup>a</sup> The boundary layer heights were obtained from the ERAS dataset of the European Centre for Medium-range Weather Forecasts (ECMWF) (accessible at <https://cds.climate.copernicus.eu/>).

**Table S6.** Statistics of synoptic systems during high-O<sub>3</sub>-and-PM<sub>2.5</sub> days from 2017 to 2022.

| Synoptic system pattern          | Date <sup>b</sup>                                                                                                                                                                                                                                                                                                                 | Number of days | Ratio (%) |
|----------------------------------|-----------------------------------------------------------------------------------------------------------------------------------------------------------------------------------------------------------------------------------------------------------------------------------------------------------------------------------|----------------|-----------|
| Typhoon periphery                | 7/29/2017, 7/30/2017, 9/16/2017, 8/24/2018, 8/25/2018, 10/6/2018, 8/24/2019, 9/28/2019, 9/29/2019, 9/30/2019, 10/1/2019, 10/2/2019, 10/11/2019, 10/12/2019, 10/18/2019, 10/19/2019, 10/20/2019, 11/6/2019, 11/13/2019, 9/2/2020, 9/3/2020, 9/30/2021, 9/10/2022, 9/11/2022, 9/12/2022, 9/13/2022, 9/16/2022, 9/17/2022, 9/18/2022 | 29             | 65.9      |
| Subtropical high-pressure system | 8/30/2017, 9/17/2017, 10/24/2017, 9/25/2019, 9/27/2019, 11/1/2019, 11/6/2019                                                                                                                                                                                                                                                      | 7              | 15.9      |

| Synoptic system pattern | Date <sup>b</sup>                                                                     | Number of days | Ratio (%) |
|-------------------------|---------------------------------------------------------------------------------------|----------------|-----------|
| Uniform pressure system | 10/7/2018, 10/8/2018, 4/5/2019, 11/10/2019, 4/15/2020, 4/26/2020, 6/6/2021, 7/31/2022 | 8              | 18.2      |

<sup>b</sup> There are 49 high-O<sub>3</sub>-and-PM<sub>2.5</sub> days from 2017 to 2022, with synoptic data missing for 5/5/2017, 5/10/2017, 7/17/2019, 7/18/2019, and 8/9/2019.

**Table S7.** Statistics on the ratio of trajectories, pathway areas, and the corresponding PM<sub>2.5</sub> and O<sub>3</sub> concentrations for each Cluster.

| Cluster NO. | Ratio of trajectories (%) | Regions passed through                                 | Average concentrations (µg m <sup>-3</sup> ) |                   |
|-------------|---------------------------|--------------------------------------------------------|----------------------------------------------|-------------------|
|             |                           |                                                        | O <sub>3</sub>                               | PM <sub>2.5</sub> |
| 1           | 23.6%                     | Guangdong Province, South China Sea.                   | 105.4 ± 11.3                                 | 44.1 ± 1.4        |
| 2           | 22.6%                     | Guangdong Province.                                    | 115.1 ± 13.3                                 | 45.3 ± 1.4        |
| 3           | 8.5%                      | Guangxi Province, Guangdong Province, Hunan Province.  | 103.2 ± 13.0                                 | 51.1 ± 1.8        |
| 4           | 8.4%                      | Guangdong Province.                                    | 147.4 ± 11.3                                 | 48.8 ± 2.1        |
| 5           | 14.8%                     | Jiangxi Province, Guangdong Province, Fujian Province. | 133.8 ± 10.2                                 | 40.2 ± 1.4        |
| 6           | 10.5%                     | Guangdong Province.                                    | 113.4 ± 10.9                                 | 42.7 ± 1.3        |
| 7           | 11.6%                     | Guangdong Province, Fujian Province, South China Sea.  | 99.6 ± 8.0                                   | 36.9 ± 1.2        |
| Average     |                           |                                                        | 115.7 ± 11.7                                 | 44.0 ± 0.6        |

## References

- Chen, J.; Hoek, G. Long-Term Exposure to PM and All-Cause and Cause-Specific Mortality: A Systematic Review and Meta-Analysis. *Environ. Int.* **2020**, *143*, 105974, doi:10.1016/j.envint.2020.105974.
- Alexeeff, S.E.; Liao, N.S.; Liu, X.; Van Den Eeden, S.K.; Sidney, S. Long-Term PM<sub>2.5</sub> Exposure and Risks of Ischemic Heart Disease and Stroke Events: Review and Meta-Analysis. *J. Am. Heart Assoc.* **2021**, *10*, 1–22, doi:10.1161/JAHA.120.016890.
- Sun, H.Z.; Yu, P.; Lan, C.; Wan, M.W.L.; Hickman, S.; Murulitharan, J.; Shen, H.; Yuan, L.; Guo, Y.; Archibald, A.T. Cohort-Based Long-Term Ozone Exposure-Associated Mortality Risks with Adjusted Metrics: A Systematic Review and Meta-Analysis. *Innovation* **2022**, *3*, 100246, doi:10.1016/j.xinn.2022.100246.
